# Supplementary material for: Thrust calculation of electric solar wind sail by particle-in-cell simulation
Source: Copernicus journal article supplement (doi:10.5194/angeo-34-845-2016), 2016-09-26
Supplement: Supplementary file 1 [file angeo-34-845-2016-supplement.zip]

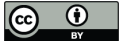

## *Supplement of*

# **Thrust calculation of electric solar wind sail by particle-in-cell simulation**

**Kento Hoshi et al.**

*Correspondence to:* Kento Hoshi (kento\_hoshi@rsh.kyoto-u.ac.jp)

- [angeo-34-845-2016-supplement-title-page.pdf](#)
- [thrust\\_estimation\\_script](#)
  - [calcThrust.py](#)

The copyright of individual parts of the supplement might differ from the CC-BY 3.0 licence.
